# Supplementary material
Source: PubMed Central journal article supplement (PMC4213115)
Supplement: supp_pp.114.248153_248153supp.pdf [file supp_pp.114.248153_248153supp.pdf]

## Ji et al. Supplemental Materials

### Supplemental Figures

**Figure S1.** All plate assay tracings for treatments with 0  $\mu$ M and 1.5  $\mu$ M ABA. A scale bar (1cm) is included with the first replicate of each treatment.

**Figure S2.** Plates traced for root length in Fig. 2H. These photos were taken four days after the tracings were made. Show here is the tenth replicate.

**Figure S3.** Expression of AtABCG17 and AtABCG18 in *abcg16* mutant relative to the wildtype background line (Col-0).

**Figure S4.** Images of 35S::GFP positive controls for root and leaf epidermus.

**Figure S5.** Gene tree of ABCG subfamily of ABC transporters in *Arabidopsis thaliana*.

### Supplemental Tables

**Table S1.** Average log(cfu) of *Pst* DC3000 in RegMap panel lines at 0,1,4, and 7 days post inoculation from each of three independent experiments described previously (Atwell et al. 2010) sorted by average titer on day 4.

**Table S2.** Candidate genes from genome-wide association map for resistance to *Pst* DC3000. Sorted by Wilcoxon score. N/As represent genes found inside candidate loci but lacking SNPs inside the gene coding region.

**Table S3.** Base calls for SNP#s 118594 – 118611 for each of the 96 lines in the RegMap panel (Atwell et al. 2010). Corresponding base positions on Chromosome 3 are shown in Table S4.

**Table S4.** Single nucleotide polymorphisms with corresponding base position, gene, base call, Wilcoxon score, EMMA score, and nucleotide diversity score.

**Table S5.** Expression of all genes in the neighborhood of *ABCG16* (At3g55090) in response to bacterial infection and exogenous application of ABA, IAA, and SA.

**Table S6.** Primers used for RT-PCR, gene and promoter cloning.

**Table S7.** RT-PCR measuring AtABCG16 expression in T-DNA knockouts, RNAi knockdowns and overexpressors.

**Table S8.** Plate assay results for germination (%) of *abcg16-1* and *abcg16-2* knockouts relative to the CS60000 background in response to low (0-3  $\mu$ M) or high (0-300  $\mu$ M) range abscisic acid (ABA), indole-3-acetic acid (IAA), or salicylic acid (SA).

**Table S9.** Plate assay results for germination (%) on day 4, root length (cm) on day 10, and mortality (%) on day 30 of *abcg16-1* and *abcg16-2* knockouts relative to the CS60000 background in response to four concentrations of abscisic acid (ABA).

**Table S10.** Leaf bacterial titers at 18 days post infection (dpi) following surface spray inoculation of soil-grown plants with *Pst* DC3118 (COR- mutant) and *Pst* DC3000 (COR+ wildtype) at Day 36 of plant growth.

**Table S11.** Shoot dry biomass (mg) at Day 95 of plant growth following surface spray inoculation of soil-grown plants with *Pst* DC3118 (COR- mutant) and *Pst* DC3000 (COR+ wildtype) at Day 36 of plant growth.

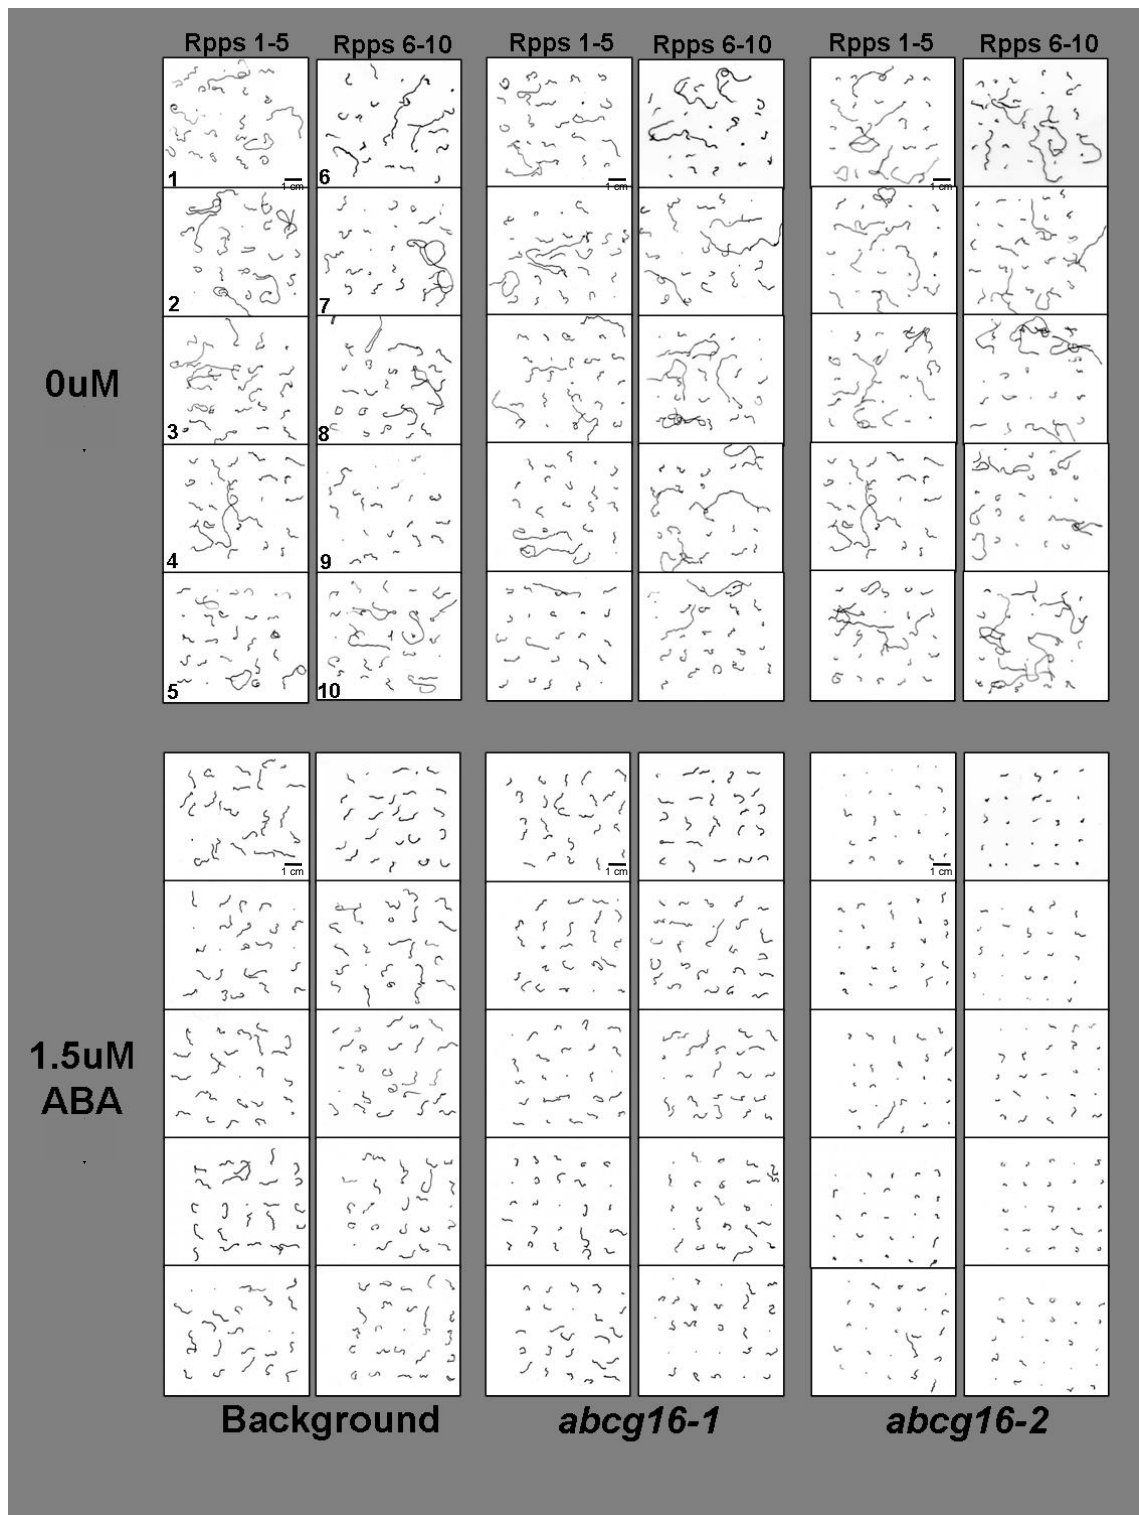

**Figure S1.** All plate assay tracings for treatments with 0  $\mu$ M and 1.5  $\mu$ M ABA. A scale bar (1cm) is included with the first replicate of each treatment.

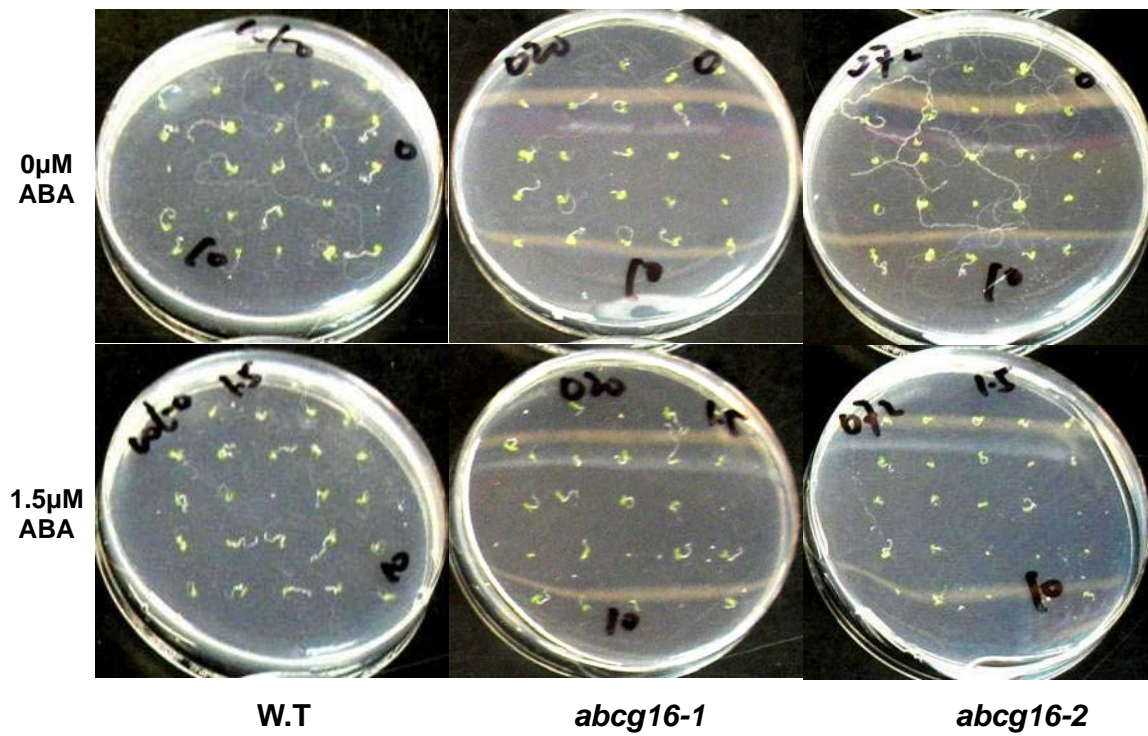

**Figure S2. Plates traced for root length in Fig. 2H.** These photos were taken four days after the tracings were made. Shown here is the tenth replicate.

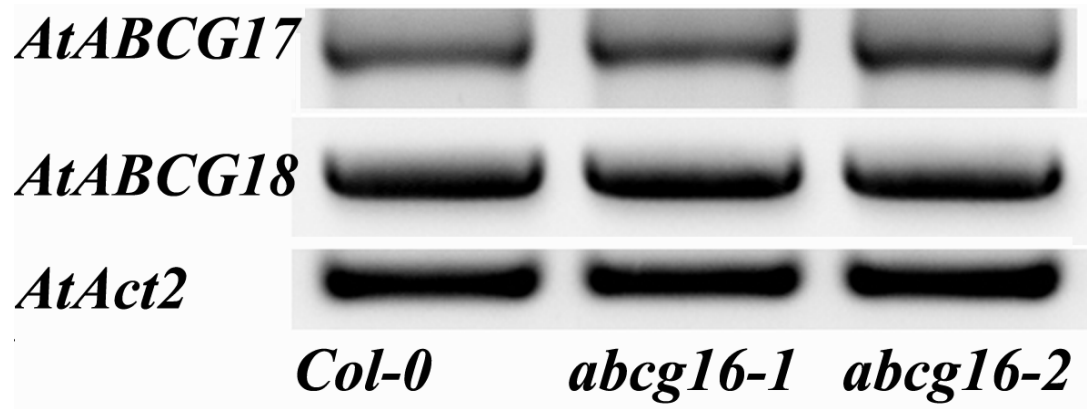

**Figure S3.** Expression of *AtABCG17* and *AtABCG18* in *abcg16* mutant relative to the wildtype background line (*Col-0*).

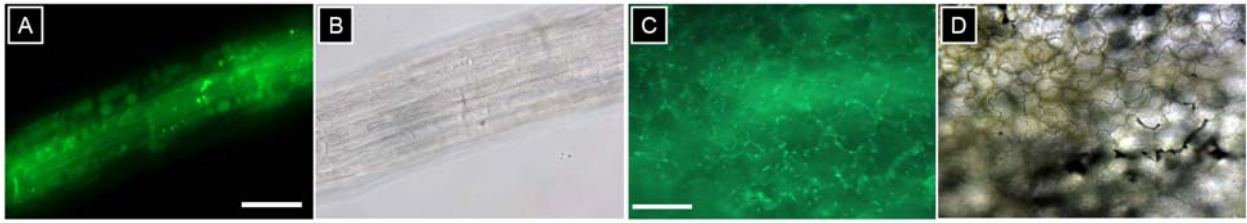

**Figure S4. Images of 35S::GFP positive controls.** Root tissue showing (A) fluorescence levels under GFP expression conditions and (B) under white light conditions. Epidermal tissue showing (C) fluorescence levels under GFP expression conditions and (D) under white light conditions.

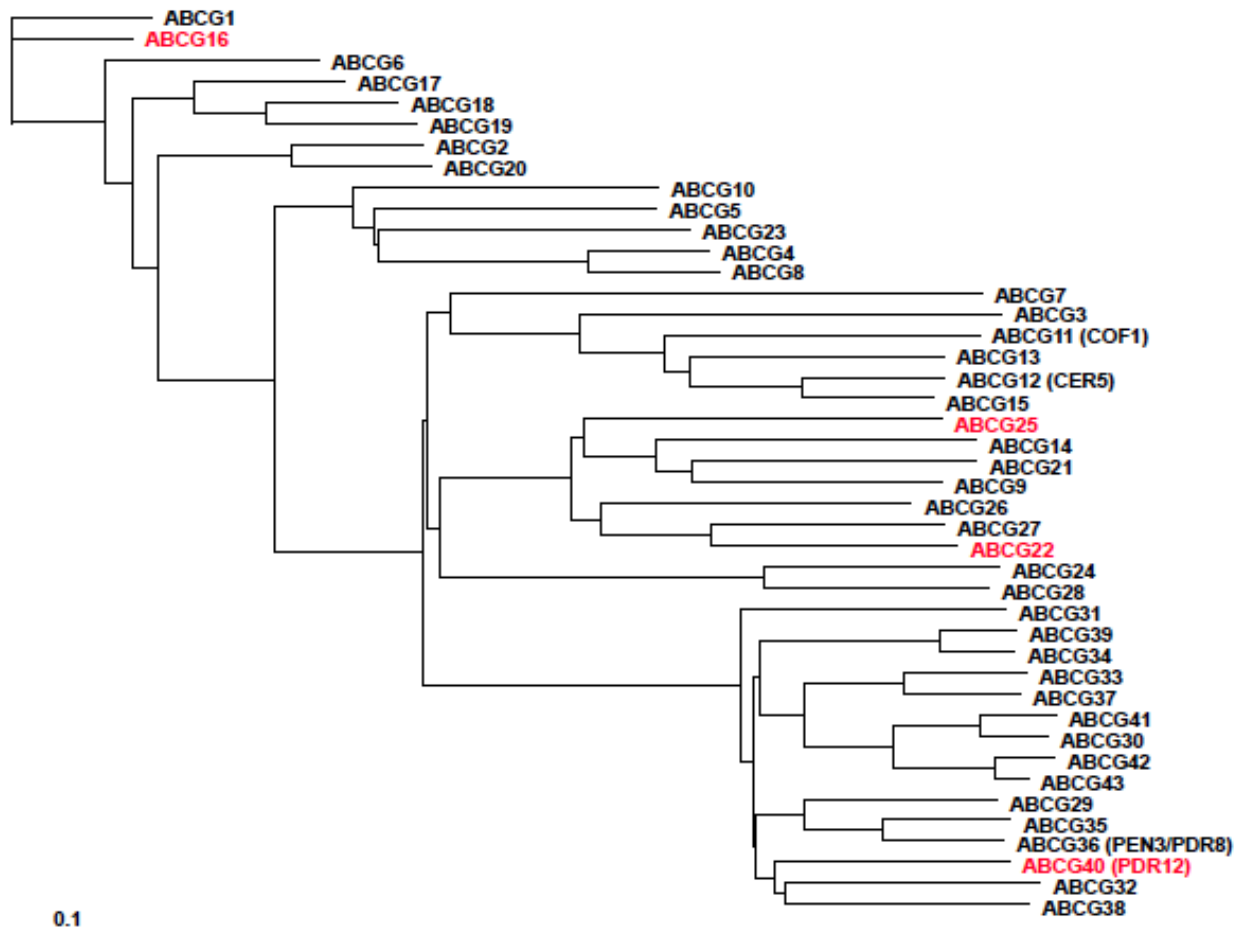

**Figure S5. Gene tree of ABCG subfamily of ABC transporters in Arabidopsis.** Phylogenetic analysis following prior analyses (Ukitsu et al., 2007; Kuromori et al., 2011). Nucleotide sequences are from TAIR (<http://www.arabidopsis.org/servlets/Search>). Sequence alignment and phylogeny tree construction were performed in Clustal X. Proteins implicated in ABA transport are indicated in red.

**Table S1.** Average log(cfu) of *Pst* DC3000 in RegMap panel lines at 0,1,4, and 7 days post inoculation from each of three independent experiments described previously (Atwell et al. 2010) sorted by average titer on day 4.

| Titer Day 4      |          |      | First Experiment |      |      |      | Second Experiment |      |      |      | Third Experiment |      |      |      |
|------------------|----------|------|------------------|------|------|------|-------------------|------|------|------|------------------|------|------|------|
| Average log(cfu) | Name     | ID   | Day0             | Day1 | Day4 | Day7 | Day0              | Day1 | Day4 | Day7 | Day0             | Day1 | Day4 | Day7 |
| 3.70             | Fab-2    | 6917 | 1.30             | 3.00 | 4.30 | 3.30 | 1.90              | 1.60 | 3.20 | 3.30 | 1.30             | -    | 3.60 | 3.30 |
| 3.89             | Lov-5    | 6046 | 1.30             | 3.00 | 4.30 | 3.30 | 1.30              | 4.08 | 4.08 | 3.78 | 2.00             | -    | 3.30 | 3.30 |
| 3.98             | Zdr-6    | 6985 | 1.30             | 2.30 | 4.30 | 3.30 | 2.15              | 4.20 | 4.34 | 6.25 | 2.15             | -    | 3.30 | 4.78 |
| 3.99             | Eden-1   | 6009 | 2.08             | 2.30 | 4.78 | 3.30 | 2.34              | 2.00 | 3.90 | 3.30 | 1.30             | -    | 3.30 | 3.30 |
| 4.40             | Spr-1-2  | 6964 | 1.30             | 2.30 | 4.30 | 3.30 | 2.73              | 1.60 | 5.60 | 3.30 | 1.30             | -    | 3.30 | 3.30 |
| 4.40             | Omo-2-1  | 7518 | 2.38             | 3.30 | 4.30 | 7.15 | 1.78              | 4.15 | 5.60 | 4.15 | 1.30             | -    | 3.30 | 5.65 |
| 4.44             | EI-2     | 6915 | 2.08             | 3.78 | 4.30 | 4.30 | 1.30              | 4.00 | 4.30 | 5.92 | 2.38             | -    | 4.72 | 3.30 |
| 4.60             | TAMM-2   | 6968 | 1.78             | 3.00 | 4.30 | 3.30 | 1.78              | 3.78 | 5.90 | 5.02 | 2.20             | -    | 3.60 | 3.30 |
| 4.60             | Wa-1     | 6978 | 1.78             | 3.30 | 4.30 | 4.15 | 1.30              | 4.85 | 6.20 | 5.89 | 2.53             | -    | 3.30 | 7.99 |
| 4.62             | GOT-22   | 6920 | 1.78             | 3.30 | 4.30 | 3.30 | 1.60              | 3.78 | 5.78 | 5.37 | 2.08             | -    | 3.78 | 3.90 |
| 4.72             | Lov-1    | 6043 | 1.30             | 3.30 | 4.30 | 3.30 | 2.00              | 3.60 | 6.56 | 4.30 | 1.90             | -    | 3.30 | 3.30 |
| 4.78             | Bay-0    | 6899 | 2.45             | 4.08 | 4.60 | 4.30 | 2.62              | 4.34 | 5.30 | 3.90 | 2.15             | -    | 4.45 | 3.30 |
| 4.87             | C24      | 6906 | 1.30             | 3.30 | 4.90 | 3.30 | 1.60              | 1.30 | 4.75 | 3.30 | 1.78             | -    | 4.95 | 3.30 |
| 4.89             | Fab-4    | 6918 | 2.45             | 3.00 | 4.30 | 3.60 | 1.30              | 3.90 | 7.06 | 6.10 | 2.92             | -    | 3.30 | 3.30 |
| 4.91             | RRS-10   | 7515 | 1.60             | 3.90 | 5.34 | 3.30 | 1.30              | 4.30 | 6.08 | 4.70 | 1.90             | -    | 3.30 | 3.30 |
| 4.91             | Pu2-23   | 6951 | 1.78             | 3.30 | 5.34 | 3.30 | 1.30              | 4.20 | 5.60 | 4.26 | 1.30             | -    | 3.78 | 3.30 |
| 4.99             | Shahdara | 6962 | 2.26             | 3.60 | 4.30 | 3.30 | 2.64              | 4.66 | 7.37 | 5.48 | 2.30             | -    | 3.30 | 3.90 |
| 5.01             | Bor-4    | 6903 | 1.30             | 3.60 | 5.00 | 8.09 | 1.30              | 4.20 | 6.72 | 5.38 | 2.83             | -    | 3.30 | 5.65 |
| 5.01             | Ts-1     | 6970 | 1.30             | 3.78 | 4.30 | 7.85 | 3.36              | 4.41 | 7.43 | 3.60 | 2.89             | -    | 3.30 | 5.43 |
| 5.01             | NFA-8    | 6944 | 1.60             | 3.60 | 5.86 | 3.30 | 1.30              | 4.66 | 4.51 | 5.48 | 2.98             | -    | 4.68 | 5.12 |
| 5.03             | An-1     | 6898 | 1.90             | 4.20 | 4.30 | 7.15 | 2.00              | 4.38 | 7.48 | 3.30 | 1.30             | -    | 3.30 | 4.58 |
| 5.09             | GOT-7    | 6921 | 1.30             | 3.30 | 4.90 | 4.73 | 1.30              | 3.60 | 5.60 | 4.15 | 2.15             | -    | 4.78 | 5.35 |
| 5.13             | TAMM-27  | 6969 | 2.00             | 3.00 | 5.89 | 6.78 | 2.87              | 4.08 | 5.90 | 3.30 | 1.30             | -    | 3.60 | 4.73 |
| 5.20             | Ms-0     | 6938 | 2.08             | 2.30 | 4.30 | 3.30 | 1.78              | 2.78 | 5.30 | 5.68 | 2.08             | -    | 6.00 | 5.51 |
| 5.27             | Eden-2   | 6913 | 1.30             | 3.30 | 4.30 | 3.30 | 2.20              | 2.58 | 8.20 | 3.30 | 1.30             | -    | 3.30 | 3.30 |
| 5.30             | Yo-0     | 6983 | 2.08             | 3.30 | 5.20 | 7.81 | 1.30              | 4.72 | 7.38 | 5.07 | 2.30             | -    | 3.30 | 7.41 |
| 5.38             | Est-1    | 6916 | 2.15             | 3.60 | 4.78 | 5.23 | 2.30              | 4.34 | 7.58 | 5.58 | 1.90             | -    | 3.78 | 3.60 |
| 5.40             | PNA-10   | 7526 | 1.90             | 3.78 | 6.56 | 7.30 | 1.60              | 4.64 | 6.34 | 4.45 | 1.60             | -    | 3.30 | 6.60 |
| 5.48             | Bil-7    | 6901 | 1.30             | 3.30 | 4.30 | 3.30 | 2.20              | 3.30 | 7.15 | 6.35 | 2.30             | -    | 5.00 | 7.88 |
| 5.50             | Omo-2-3  | 7519 | 2.20             | 3.90 | 6.34 | 3.60 | 1.30              | 4.76 | 4.83 | 5.03 | 1.30             | -    | 5.33 | 7.62 |
| 5.52             | Mz-0     | 6940 | 2.00             | 2.30 | 5.91 | 6.60 | 3.13              | 3.60 | 4.64 | 3.30 | 1.30             | -    | 6.00 | 3.30 |
| 5.53             | KZ-1     | 6930 | 1.90             | 3.30 | 5.98 | 7.08 | 2.15              | 3.30 | 6.99 | 3.30 | 2.53             | -    | 3.60 | 3.30 |
| 5.56             | Edi-0    | 6914 | 2.20             | 3.30 | 4.30 | 3.30 | 1.30              | 4.88 | 6.87 | -    | 2.34             | -    | 5.52 | 5.36 |
| 5.63             | Wei-0    | 6979 | 1.30             | 3.30 | 4.30 | 6.90 | 1.30              | 3.30 | 7.74 | 5.66 | 1.78             | -    | 4.86 | 7.66 |
| 5.64             | PNA-17   | 7523 | 1.78             | 3.30 | 5.38 | 7.20 | 2.20              | 4.41 | 8.25 | 6.20 | 2.20             | -    | 3.30 | 7.26 |
| 5.77             | Mr-0     | 7522 | 1.30             | 3.00 | 4.30 | -    | 1.30              | 3.30 | 6.15 | 6.68 | 1.30             | -    | 6.86 | 5.41 |
| 5.80             | HR-10    | 6923 | 1.90             | 2.30 | 4.30 | 6.30 | 2.45              | 4.20 | 6.81 | 6.51 | 1.30             | -    | 6.30 | 7.38 |
| 5.81             | KNO-10   | 6927 | 1.30             | 3.30 | 5.60 | 7.64 | 1.30              | 4.34 | 6.83 | 4.08 | 1.90             | -    | 4.99 | 7.60 |
| 5.93             | Ws-0     | 6980 | 2.20             | 3.60 | 4.30 | 6.30 | 1.30              | 3.90 | 6.11 | 5.89 | 2.38             | -    | 7.38 | 5.12 |
| 5.94             | Nd-1     | 6942 | 1.78             | 3.60 | 6.43 | 7.62 | 1.90              | 4.38 | 8.07 | 5.76 | 2.87             | -    | 3.30 | 7.41 |
| 5.97             | RMX-A180 | 7525 | 1.90             | 2.30 | 6.49 | 7.64 | 1.30              | 4.08 | 6.41 | 4.68 | 2.08             | -    | 5.02 | 7.51 |
| 5.99             | Kas-1    | 8424 | 2.41             | 3.30 | 4.30 | 7.20 | 2.20              | 3.78 | 5.78 | 3.30 | 2.00             | -    | 7.89 | 3.30 |
| 6.03             | Zdr-1    | 6984 | 1.78             | 3.30 | 4.78 | 6.60 | 1.60              | 4.51 | 6.70 | 4.93 | 1.78             | -    | 6.60 | 5.63 |
| 6.05             | CIBC-5   | 6730 | 1.60             | 3.30 | 4.30 | 6.60 | 1.30              | 3.30 | 6.91 | 6.81 | 1.90             | -    | 6.94 | 3.30 |
| 6.07             | CS22491  | 7438 | 1.30             | 3.00 | 6.15 | 7.76 | 2.51              | 4.00 | 6.56 | 6.41 | 2.85             | -    | 5.51 | 8.38 |
| 6.12             | RMX-A02  | 7524 | 2.60             | 3.00 | 5.76 | 5.42 | 2.30              | 4.48 | 8.20 | 5.51 | 2.38             | -    | 4.38 | 6.30 |
| 6.12             | Van-0    | 6977 | 1.90             | 3.90 | 6.90 | 5.47 | 2.64              | 4.34 | 7.15 | 4.38 | 2.45             | -    | 4.30 | 3.30 |
| 6.13             | Uod-1    | 6975 | 1.78             | 2.30 | 6.58 | 7.15 | 2.08              | 4.64 | 6.48 | 5.77 | 1.78             | -    | 5.35 | 5.61 |
| 6.16             | Pu2-7    | 6956 | 1.78             | 2.30 | 6.43 | 6.30 | 2.08              | 4.56 | 7.48 | 6.46 | 2.76             | -    | 4.58 | 3.30 |
| 6.18             | Kondara  | 6929 | 2.08             | 3.30 | 6.45 | 6.90 | 2.34              | 4.20 | 7.54 | 5.21 | 2.15             | -    | 4.53 | 6.30 |
| 6.21             | LP2-2    | 7520 | 2.00             | 3.30 | 4.30 | 3.30 | 1.60              | 4.15 | 7.60 | 5.06 | 1.60             | -    | 6.72 | 7.15 |
| 6.28             | Ts-5     | 6971 | 1.90             | 3.60 | 5.26 | 7.53 | 1.30              | 4.15 | 6.72 | 6.32 | 2.48             | -    | 6.86 | 4.95 |
| 6.31             | Lz-0     | 6936 | 1.30             | 3.30 | 5.00 | 4.62 | 1.30              | 4.30 | 6.91 | 4.34 | 2.30             | -    | 7.02 | 5.14 |
| 6.34             | Fei-0    | 8215 | 2.08             | 3.30 | 6.19 | 7.00 | 3.02              | 4.70 | 7.40 | 5.06 | 1.30             | -    | 5.43 | 5.55 |
| 6.36             | Bil-5    | 6900 | 2.26             | 2.30 | 4.30 | 3.30 | 1.60              | 4.00 | 7.43 | 5.89 | 2.64             | -    | 7.34 | 3.30 |
| 6.39             | Ler-1    | 6932 | 2.00             | 3.60 | 4.30 | 7.87 | 2.53              | 4.81 | 7.95 | 6.11 | 2.79             | -    | 6.92 | 4.86 |
| 6.43             | Ws-2     | 6981 | 1.30             | 3.90 | 4.60 | 8.29 | 2.08              | 2.41 | 7.11 | 6.90 | 1.30             | -    | 7.58 | 7.08 |
| 6.45             | RRS-7    | 7514 | 1.78             | 3.78 | 6.97 | 7.91 | 2.34              | 4.30 | 8.01 | 5.95 | 1.90             | -    | 4.38 | 7.62 |
| 6.53             | Bur-0    | 6905 | 2.00             | 4.08 | 6.55 | 7.45 | 2.15              | 4.00 | 7.04 | 5.70 | 1.90             | -    | 6.00 | 5.19 |
| 6.61             | Uil-2-3  | 6973 | 1.90             | 4.15 | 6.62 | 4.56 | 1.60              | 4.00 | 8.06 | 6.60 | 1.30             | -    | 5.15 | 5.27 |
| 6.67             | Cvi-0    | 6911 | 2.58             | 3.78 | 6.59 | 7.79 | 1.30              | 4.00 | 7.45 | 6.68 | 2.41             | -    | 5.97 | 7.73 |
| 6.70             | SQ-1     | 6966 | 2.30             | 3.30 | 6.31 | 7.41 | 3.29              | 3.60 | 7.39 | 6.51 | 1.78             | -    | 6.38 | 7.58 |
| 6.70             | KZ-9     | 6931 | 2.56             | 3.00 | 5.92 | 6.90 | 2.79              | 4.48 | 7.27 | 3.30 | 2.38             | -    | 6.90 | 3.30 |
| 6.72             | Spr-1-6  | 6965 | 1.90             | 3.00 | 6.63 | 7.73 | 1.30              | 4.38 | 5.39 | 6.90 | 1.30             | -    | 8.15 | 7.15 |
| 6.77             | Se-0     | 6961 | 2.00             | 3.30 | 6.97 | 7.91 | 2.68              | 4.53 | 7.45 | 5.46 | 2.68             | -    | 5.90 | 3.30 |
| 6.78             | Gu-0     | 6922 | 2.15             | 3.00 | 5.45 | 7.08 | 2.58              | 3.90 | 8.11 | 4.85 | 2.08             | -    | 6.78 | 6.20 |
| 6.79             | Uod-7    | 6976 | 2.41             | 3.60 | 7.00 | 6.78 | 2.30              | 4.00 | 6.26 | 5.37 | 2.00             | -    | 7.11 | 6.78 |
| 6.79             | LP2-6    | 7521 | 1.30             | 4.15 | 6.81 | 7.68 | 1.78              | 4.72 | 7.23 | 5.92 | 2.60             | -    | 6.34 | 5.54 |
| 6.80             | NFA-10   | 6943 | 2.15             | 3.78 | 6.94 | 8.24 | 3.16              | 3.30 | 8.20 | 3.30 | 2.81             | -    | 7.26 | 6.60 |
| 6.81             | KNO-18   | 6928 | 2.00             | 3.30 | 6.50 | 7.00 | 2.76              | 4.60 | 7.06 | 4.45 | 1.78             | -    | 6.87 | 7.91 |
| 6.82             | Bor-1    | 5837 | 2.20             | 4.15 | 6.32 | 6.30 | 2.26              | 4.15 | 6.85 | 6.27 | 1.30             | -    | 7.28 | 7.41 |
| 6.83             | Tsu-1    | 6972 | 2.34             | 2.30 | 6.16 | 7.15 | 1.60              | 4.38 | 7.07 | 6.40 | 2.15             | -    | 7.25 | 7.48 |
| 6.85             | Sorbo    | 6963 | 2.48             | 3.30 | 6.65 | 7.56 | 2.15              | 3.90 | 7.21 | 6.40 | 2.30             | -    | 6.70 | 6.30 |
| 6.86             | Oy-0     | 6946 | 1.90             | 3.30 | 5.82 | 7.86 | 2.30              | 4.00 | 7.94 | 6.32 | 2.20             | -    | 6.82 | 5.20 |
| 6.87             | Wit-5    | 6982 | 2.53             | 3.60 | 5.75 | 6.90 | 2.15              | 4.15 | 7.97 | 6.68 | 1.90             | -    | 6.89 | 7.20 |
| 6.91             | Var-2-6  | 7517 | 1.30             | 3.30 | 5.91 | -    | 1.30              | 4.00 | 7.26 | 4.81 | 2.15             | -    | 7.55 | 3.30 |
| 6.92             | Gy-0     | 8214 | 2.08             | 2.30 | 7.08 | 7.72 | 2.45              | 4.30 | 7.97 | 6.40 | 1.60             | -    | 5.71 | 6.90 |
| 6.97             | LL-0     | 6933 | 1.30             | 3.78 | 6.43 | 7.48 | 2.51              | 4.15 | 7.46 | 3.30 | 2.53             | -    | 7.01 | 7.53 |
| 7.03             | Ga-0     | 6919 | 2.00             | 3.30 | 6.28 | 7.73 | 1.30              | 3.30 | 8.10 | 5.55 | 2.15             | -    | 6.72 | 5.68 |
| 7.05             | Ag-0     | 6897 | 1.78             | 3.00 | 6.71 | 7.00 | 1.30              | 4.48 | 7.15 | 6.81 | 2.00             | -    | 7.30 | 3.30 |
| 7.10             | Col-0    | 6909 | 2.45             | 4.00 | 6.25 | 7.83 | 2.20              | 4.30 | 8.11 | 6.90 | 2.30             | -    | 6.95 | 7.75 |
| 7.13             | Pro-0    | 8213 | 2.00             | 3.60 | 6.45 | 7.48 | 1.30              | 4.86 | 7.53 | 6.68 | 2.45             | -    | 7.42 | 7.92 |
| 7.18             | Mt-0     | 6939 | 2.30             | 3.30 | 6.00 | 7.53 | 2.56              | 4.15 | 7.70 | 6.68 | 1.30             | -    | 7.85 | 7.30 |
| 7.19             | REN-1    | 6959 | 2.00             | 3.30 | 6.13 | 4.66 | 3.03              | 4.93 | 7.78 | 4.88 | 3.11             | -    | 7.65 | 7.56 |
| 7.24             | CIBC-17  | 6907 | 2.38             | 3.78 | 6.54 | 8.11 | 1.90              | 4.51 | 7.64 | 6.08 | 2.00             | -    | 7.55 | 4.81 |
| 7.26             | HR-5     | 6924 | 2.45             | 3.30 | 7.17 | 8.38 | 1.30              | 4.75 | 6.95 | 5.45 | 2.15             | -    | 7.67 | 4.90 |
| 7.32             | REN-11   | 6960 | 1.30             | 4.38 | 7.26 | 8.26 | 2.08              | 4.00 | 7.65 | 6.98 | 2.72             | -    | 7.06 | 5.32 |
| 7.34             | Ct-1     | 6910 | 1.30             | 3.60 | 6.54 | 6.60 | 1.78              | 4.38 | 7.38 | 3.30 | 1.30             | -    | 8.08 | 7.15 |
| 7.36             | Bf-0     | 6904 | 1.60             | 3.78 | 6.36 | 6.78 | 2.30              | 4.08 | 8.18 | 6.51 | 2.15             | -    | 7.55 | 7.15 |

**Table S2.** Candidate genes from genome-wide association map for resistance to *Pst* DC3000. Sorted by Wilcoxon score. N/As represent genes found inside candidate loci but lacking SNPs inside the gene coding region.

| Rank | Wilcoxon.DC3000 | Locus | Gene      | Name    | Description                                                   |
|------|-----------------|-------|-----------|---------|---------------------------------------------------------------|
| 1    | 5.42            | 3     | AT2G21910 | CYP96A5 | CYTOCHROME P450                                               |
| 2    | 4.97            | 7     | AT2G44581 | Unknown | RING/U-box superfamily protein                                |
| 3    | 4.93            | 8     | AT2G45850 | Unknown | AT hook motif DNA-binding family protein                      |
| 3    | 4.93            | 8     | AT2G45890 | RHS11   | Kinase partner family protein                                 |
| 3    | 4.93            | 8     | AT2G45900 | Unknown | Phosphatidylinositol N-acetylglucosaminyltransferase subunit  |
| 6    | 4.91            | 7     | AT2G44570 | GH9B12  | Glycosyl hydrolase 9B12,hydrolase activity                    |
| 6    | 4.91            | 7     | AT2G44590 | DL1D    | DYNAMIN-like 1D,GTPase activity                               |
| 8    | 4.89            | 8     | AT2G45870 | Unknown | Bestrophin-like protein                                       |
| 9    | 4.77            | 12    | AT4G32970 | Unknown | Unknown                                                       |
| 10   | 4.74            | 8     | AT2G45860 | Unknown | Unknown                                                       |
| 11   | 4.58            | 4     | AT2G22950 | Unknown | Cation transporter/ E1-E2 ATPase family protein               |
| 12   | 4.54            | 10    | AT3G55070 | Unknown | LisH/CRA/RING-U-box domains-containing protein                |
| 13   | 4.53            | 12    | AT4G32960 | Unknown | Unknown                                                       |
| 14   | 4.42            | 12    | AT4G32980 | ATH1    | Transcription factor involved in photomorphogenesis           |
| 15   | 4.29            | 2     | AT2G17580 | Unknown | Undecaprenyl pyrophosphate synthetase family protein          |
| 16   | 4.25            | 6     | AT2G43850 | Unknown | Integrin-linked protein kinase family                         |
| 17   | 4.17            | 8     | AT2G45830 | DTA2    | Downstream target of AGL15, post-germinative development      |
| 18   | 4.16            | 1     | AT1G78660 | GGH1    | Gamma-glutamyl hydrolase cleaving pentaglutamates             |
| 19   | 4.14            | 10    | AT3G55080 | Unknown | SET domain-containing protein                                 |
| 19   | 4.14            | 10    | AT3G55090 | ABCG16  | ABC-2 type transporter family protein                         |
| 21   | 3.86            | 2     | AT2G17560 | Unknown | HMGB (high mobility group B) protein                          |
| 22   | 3.82            | 2     | AT2G17570 | Unknown | Undecaprenyl pyrophosphate synthetase family protein          |
| 23   | 3.81            | 6     | AT2G43820 | SAGT1   | Induced by Salicylic acid, virus, fungus and bacteria         |
| 24   | 3.79            | 6     | AT2G43840 | UGT74F1 | Transfers UDP:glucose to salicylic acid (forming a glucoside) |
| 25   | 3.57            | 12    | AT4G32950 | Unknown | Protein phosphatase 2C family protein                         |
| 26   | 3.55            | 9     | AT3G03060 | Unknown | P-loop containing nucleoside triphosphate hydrolase           |
| 27   | 3.51            | 4     | AT2G22970 | SCPL11  | Serine-type carboxypeptidase activity                         |
| 28   | 3.48            | 11    | AT4G15180 | SDG2    | SET domain protein 2                                          |
| 29   | 3.37            | 5     | AT2G27600 | SKD1    | Suppressor of K+ Transport Growth Defect1                     |
| 29   | 3.37            | 5     | AT2G27610 | Unknown | Tetratricopeptide repeat (TPR)-like superfamily protein       |
| 29   | 3.37            | 5     | AT2G27630 | Unknown | Ubiquitin carboxyl-terminal hydrolase-related protein         |
| 32   | 3.34            | 1     | AT1G78650 | POLD3   | Similar to DNA polymerase delta                               |
| 33   | 2.95            | 9     | AT3G03050 | RHD7    | Root hair development                                         |
| 34   | 2.90            | 9     | AT3G03070 | Unknown | NADH-ubiquinone oxidoreductase-related                        |
| 35   | 2.68            | 4     | AT2G22960 | Unknown | Alpha/beta-Hydrolases superfamily protein                     |
| N/A  | N/A             | 2     | AT2G17556 | Unknown | Unknown                                                       |
| N/A  | N/A             | 2     | AT2G17590 | Unknown | Cysteine/Histidine-rich C1 domain family protein              |
| N/A  | N/A             | 3     | AT2G21905 | Unknown | Pseudogene                                                    |
| N/A  | N/A             | 3     | AT2G21920 | Unknown | F-box associated ubiquitination effector family protein       |
| N/A  | N/A             | 4     | AT2G22942 | Unknown | Growth factors                                                |
| N/A  | N/A             | 4     | AT2G22955 | Unknown | Potential natural antisense gene                              |
| N/A  | N/A             | 4     | AT2G22980 | SCPL13  | Serine carboxypeptidase-like 13                               |
| N/A  | N/A             | 5     | AT2G27650 | Unknown | Ubiquitin carboxyl-terminal hydrolase-related protein         |
| N/A  | N/A             | 6     | AT2G43830 | Unknown | Pseudogene                                                    |
| N/A  | N/A             | 6     | AT2G43860 | Unknown | Pectin lyase-like superfamily protein                         |
| N/A  | N/A             | 7     | AT2G44578 | Unknown | RING/U-box superfamily protein                                |
| N/A  | N/A             | 7     | AT2G44580 | Unknown | Zinc ion binding                                              |
| N/A  | N/A             | 8     | AT2G45840 | Unknown | InterPro DOMAIN/s                                             |
| N/A  | N/A             | 8     | AT2G45880 | BAM7    | Encodes a beta-amylase-like protein                           |
| N/A  | N/A             | 10    | AT3G55060 | Unknown | Unknown                                                       |
| N/A  | N/A             | 11    | AT4G15165 | Unknown | N-terminal nucleophile aminohydrolases                        |
| N/A  | N/A             | 13    | AT5G25310 | Unknown | Exostosin family protein                                      |
| N/A  | N/A             | 13    | AT5G25320 | Unknown | ACT-like superfamily protein                                  |
| N/A  | N/A             | 13    | AT5G25330 | Unknown | Acetylglucosaminyltransferase family protein                  |



**Table S3.** Base calls for SNP#s 118594 – 118611 for each of the 96 lines in the RegMap panel (Atwell et al. 2010). Corresponding base positions on Chromosome 3 are shown in Table S4.

| logcfu | Name     | Line | 118594 | 118595 | 118596 | 118597 | 118598 | 118599 | 118600 | 118601 | 118602 | 118603 | 118604 | 118605 | 118606 | 118607 | 118608 | 118609 | 118610 | 118611 |
|--------|----------|------|--------|--------|--------|--------|--------|--------|--------|--------|--------|--------|--------|--------|--------|--------|--------|--------|--------|--------|
| 3.70   | Fab.2    | 6917 | G      | G      | C      | A      | A      | T      | A      | G      | C      | T      | T      | G      | A      | C      | G      | T      | A      | G      |
| 3.89   | Lov.5    | 6046 | G      | G      | C      | A      | A      | T      | A      | G      | C      | T      | T      | G      | A      | C      | G      | T      | A      | G      |
| 3.98   | Zor.6    | 6985 | A      | A      | T      | G      | A      | T      | A      | A      | C      | T      | T      | A      | G      | A      | G      | T      | A      | G      |
| 3.99   | Eden.1   | 6009 | G      | G      | C      | A      | A      | T      | A      | A      | C      | T      | T      | G      | A      | C      | G      | T      | A      | G      |
| 4.40   | Spr.1.2  | 6964 | A      | A      | T      | G      | A      | T      | A      | A      | C      | T      | T      | A      | G      | A      | G      | T      | A      | G      |
| 4.40   | Omo.2.1  | 7518 | A      | A      | T      | G      | A      | T      | A      | A      | C      | T      | T      | A      | G      | A      | G      | T      | A      | G      |
| 4.44   | EI.2     | 6915 | A      | A      | T      | G      | A      | T      | A      | A      | C      | T      | T      | A      | G      | A      | G      | T      | A      | G      |
| 4.60   | TAMM.2   | 6968 | G      | G      | C      | A      | A      | T      | A      | A      | C      | T      | T      | G      | A      | C      | G      | T      | A      | G      |
| 4.60   | Wa.1     | 6978 | A      | A      | T      | G      | A      | T      | A      | A      | C      | T      | T      | A      | G      | A      | G      | T      | A      | G      |
| 4.62   | GOT.22   | 6920 | A      | A      | T      | G      | A      | T      | A      | A      | C      | T      | T      | A      | G      | A      | G      | T      | A      | G      |
| 4.72   | Lov.1    | 6043 | G      | G      | C      | A      | A      | T      | A      | A      | C      | T      | T      | G      | A      | C      | G      | T      | A      | G      |
| 4.78   | Lov.0    | 6899 | A      | A      | T      | G      | A      | T      | A      | A      | C      | T      | T      | A      | G      | A      | G      | T      | A      | G      |
| 4.87   | Bay.0    | 6906 | A      | A      | T      | G      | A      | T      | A      | A      | C      | T      | T      | A      | G      | A      | G      | T      | A      | G      |
| 4.89   | C24      | 6918 | G      | G      | C      | A      | A      | T      | A      | A      | C      | T      | T      | A      | G      | A      | G      | T      | A      | G      |
| 4.91   | Fab.4    | 6918 | G      | G      | C      | A      | A      | T      | A      | A      | C      | T      | T      | A      | G      | A      | G      | T      | A      | G      |
| 4.91   | Pu2.23   | 6951 | A      | A      | T      | G      | A      | T      | A      | A      | C      | T      | T      | A      | G      | A      | G      | T      | A      | G      |
| 4.91   | RRS.10   | 7515 | A      | A      | T      | G      | A      | T      | A      | A      | C      | T      | T      | A      | G      | A      | G      | T      | A      | G      |
| 4.99   | Shahdara | 6962 | A      | A      | T      | G      | A      | T      | A      | A      | C      | T      | T      | A      | G      | A      | G      | T      | A      | G      |
| 5.01   | Bor.4    | 6903 | A      | A      | T      | G      | A      | T      | A      | A      | C      | T      | T      | A      | G      | A      | G      | T      | A      | G      |
| 5.01   | NFA.8    | 6944 | A      | A      | T      | G      | A      | T      | A      | A      | C      | T      | T      | A      | G      | A      | G      | T      | A      | G      |
| 5.01   | Ts.1     | 6970 | A      | A      | T      | G      | A      | T      | A      | A      | C      | T      | T      | A      | G      | A      | G      | T      | A      | G      |
| 5.03   | An.1     | 6898 | A      | A      | T      | G      | A      | T      | A      | A      | C      | T      | T      | A      | G      | A      | G      | T      | A      | G      |
| 5.09   | GOT.7    | 6921 | A      | A      | T      | G      | A      | T      | A      | A      | C      | T      | T      | A      | G      | A      | G      | T      | A      | G      |
| 5.09   | TAMM.27  | 6969 | G      | G      | C      | A      | A      | T      | A      | A      | C      | T      | T      | G      | A      | C      | G      | T      | A      | G      |
| 5.10   | Ms.0     | 6938 | A      | A      | T      | G      | A      | T      | A      | A      | C      | T      | T      | A      | G      | A      | G      | T      | A      | G      |
| 5.20   | Eden.2   | 6913 | G      | G      | C      | A      | A      | T      | A      | A      | C      | T      | T      | A      | G      | A      | G      | T      | A      | G      |
| 5.27   | Yo.0     | 6983 | A      | A      | T      | G      | A      | T      | A      | A      | C      | T      | T      | A      | G      | A      | G      | T      | A      | G      |
| 5.30   | Yo.0     | 6983 | A      | A      | T      | G      | A      | T      | A      | A      | C      | T      | T      | A      | G      | A      | G      | T      | A      | G      |
| 5.38   | Est.1    | 6916 | A      | A      | T      | G      | A      | T      | A      | A      | C      | T      | T      | A      | G      | A      | G      | T      | A      | G      |
| 5.40   | PNA.10   | 7525 | A      | A      | T      | G      | A      | T      | A      | A      | C      | T      | T      | A      | G      | A      | G      | T      | A      | G      |
| 5.48   | Bil.7    | 6901 | A      | A      | T      | G      | A      | T      | A      | A      | C      | T      | T      | A      | G      | A      | G      | T      | A      | G      |
| 5.50   | Omo.2.3  | 7519 | A      | A      | T      | G      | A      | T      | A      | A      | C      | T      | T      | A      | G      | A      | G      | T      | A      | G      |
| 5.52   | Mz.0     | 6940 | A      | A      | T      | G      | A      | T      | A      | A      | C      | T      | T      | A      | G      | A      | G      | T      | A      | G      |
| 5.53   | KZ.1     | 6934 | A      | A      | T      | G      | A      | T      | A      | A      | C      | T      | T      | A      | G      | A      | G      | T      | A      | G      |
| 5.56   | Edi.0    | 6914 | A      | A      | T      | G      | A      | T      | A      | A      | C      | T      | T      | A      | G      | A      | G      | T      | A      | G      |
| 5.63   | Wei.0    | 6979 | A      | A      | T      | G      | A      | T      | A      | A      | C      | T      | T      | A      | G      | A      | G      | T      | A      | G      |
| 5.64   | PNA.17   | 7523 | A      | A      | C      | G      | A      | T      | A      | A      | C      | T      | T      | A      | G      | A      | G      | T      | A      | G      |
| 5.77   | Mr.0     | 7522 | A      | A      | C      | G      | A      | T      | A      | A      | C      | T      | T      | A      | G      | A      | G      | T      | A      | G      |
| 5.80   | HR.10    | 6923 | A      | A      | T      | G      | A      | T      | A      | A      | C      | T      | T      | A      | G      | A      | G      | T      | A      | G      |
| 5.81   | KNO.10   | 6927 | A      | A      | T      | G      | A      | T      | A      | A      | C      | T      | T      | A      | G      | A      | G      | T      | A      | G      |
| 5.93   | Ws.0     | 6980 | A      | A      | T      | G      | A      | T      | A      | A      | C      | T      | T      | A      | G      | A      | G      | T      | A      | G      |
| 5.94   | Ni.1     | 6942 | A      | A      | T      | G      | A      | T      | A      | A      | C      | T      | T      | A      | G      | A      | G      | T      | A      | G      |
| 5.97   | RMX.A180 | 7525 | A      | A      | T      | G      | A      | T      | A      | A      | C      | T      | T      | A      | G      | A      | G      | T      | A      | G      |
| 5.99   | Kas.1    | 8424 | A      | A      | T      | G      | A      | T      | A      | A      | C      | T      | T      | A      | G      | A      | G      | T      | A      | G      |
| 6.03   | Zor.1    | 6984 | A      | A      | T      | G      | A      | T      | A      | A      | C      | T      | T      | A      | G      | A      | G      | T      | A      | G      |
| 6.05   | CIBC.5   | 6730 | A      | A      | T      | G      | A      | T      | A      | A      | C      | T      | T      | A      | G      | A      | G      | T      | A      | G      |
| 6.07   | CS22491  | 7438 | A      | A      | T      | G      | A      | T      | A      | A      | C      | T      | T      | A      | G      | A      | G      | T      | A      | G      |
| 6.12   | Van.0    | 6977 | A      | A      | T      | G      | A      | T      | A      | A      | C      | T      | T      | A      | G      | A      | G      | T      | A      | G      |
| 6.12   | RMX.A02  | 7524 | A      | A      | T      | G      | A      | T      | A      | A      | C      | T      | T      | A      | G      | A      | G      | T      | A      | G      |
| 6.13   | Uod.1    | 6975 | A      | A      | T      | G      | A      | T      | A      | A      | C      | T      | T      | A      | G      | A      | G      | T      | A      | G      |
| 6.16   | Pu2.7    | 6966 | A      | A      | T      | G      | A      | T      | A      | A      | C      | T      | T      | A      | G      | A      | G      | T      | A      | G      |
| 6.18   | Kondara  | 6929 | A      | A      | T      | G      | A      | T      | A      | A      | C      | T      | T      | A      | G      | A      | G      | T      | A      | G      |
| 6.21   | LP.2     | 7520 | A      | A      | T      | G      | A      | T      | A      | A      | C      | T      | T      | A      | G      | A      | G      | T      | A      | G      |
| 6.28   | Ts.5     | 6971 | A      | A      | T      | G      | A      | T      | A      | A      | C      | T      | T      | A      | G      | A      | G      | T      | A      | G      |
| 6.31   | Lz.0     | 6936 | A      | A      | T      | G      | A      | T      | A      | A      | C      | T      | T      | A      | G      | A      | G      | T      | A      | G      |
| 6.34   | Fei.0    | 8215 | A      | A      | T      | G      | A      | T      | A      | A      | C      | T      | T      | A      | G      | A      | G      | T      | A      | G      |
| 6.36   | Bil.5    | 6900 | A      | A      | T      | G      | A      | T      | A      | A      | C      | T      | T      | A      | G      | A      | G      | T      | A      | G      |
| 6.39   | Ler.1    | 6932 | A      | A      | T      | G      | A      | T      | A      | A      | C      | T      | T      | A      | G      | A      | G      | T      | A      | G      |
| 6.43   | Ws.2     | 6981 | A      | A      | T      | G      | A      | T      | A      | A      | C      | T      | T      | A      | G      | A      | G      | T      | A      | G      |
| 6.45   | RRS.7    | 7514 | A      | A      | T      | G      | A      | T      | A      | A      | C      | T      | T      | A      | G      | A      | G      | T      | A      | G      |
| 6.53   | Bur.0    | 6905 | A      | A      | T      | G      | A      | T      | A      | A      | C      | T      | T      | A      | G      | A      | G      | T      | A      | G      |
| 6.61   | UIL2.3   | 6973 | A      | A      | T      | G      | A      | T      | A      | A      | C      | T      | T      | A      | G      | A      | G      | T      | A      | G      |
| 6.67   | Cvi.0    | 6911 | A      | A      | T      | G      | A      | T      | A      | A      | C      | T      | T      | A      | G      | A      | G      | T      | A      | G      |
| 6.70   | KZ.9     | 6931 | A      | A      | T      | G      | A      | T      | A      | A      | C      | T      | T      | A      | G      | A      | G      | T      | A      | G      |
| 6.70   | SQ.1     | 6966 | A      | A      | T      | G      | A      | T      | A      | A      | C      | T      | T      | A      | G      | A      | G      | T      | A      | G      |
| 6.72   | Spr.1.6  | 6965 | A      | A      | T      | G      | A      | T      | A      | A      | C      | T      | T      | A      | G      | A      | G      | T      | A      | G      |
| 6.77   | Se.0     | 6961 | A      | A      | T      | G      | A      | T      | A      | A      | C      | T      | T      | A      | G      | A      | G      | T      | A      | G      |
| 6.78   | Gu.0     | 6922 | A      | A      | T      | G      | A      | T      | A      | A      | C      | T      | T      | A      | G      | A      | G      | T      | A      | G      |
| 6.79   | Uod.7    | 6976 | A      | A      | T      | G      | A      | T      | A      | A      | C      | T      | T      | A      | G      | A      | G      | T      | A      | G      |
| 6.79   | LP2.6    | 7521 | A      | A      | T      | G      | A      | T      | A      | A      | C      | T      | T      | A      | G      | A      | G      | T      | A      | G      |
| 6.80   | NFA.10   | 6943 | A      | A      | T      | G      | A      | T      | A      | A      | C      | T      | T      | A      | G      | A      | G      | T      | A      | G      |
| 6.81   | KNO.18   | 6928 | A      | A      | T      | G      | A      | T      | A      | A      | C      | T      | T      | A      | G      | A      | G      | T      | A      | G      |
| 6.82   | Bor.1    | 5837 | A      | A      | T      | G      | A      | T      | A      | A      | C      | T      | T      | A      | G      | A      | G      | T      | A      | G      |
| 6.83   | Tsu.1    | 6972 | A      | A      | T      | G      | A      | T      | A      | A      | C      | T      | T      | A      | G      | A      | G      | T      | A      | G      |
| 6.85   | Sorbo    | 6963 | A      | A      | T      | G      | A      | T      | A      | A      | C      | T      | T      | A      | G      | A      | G      | T      | A      | G      |
| 6.86   | Oy.0     | 6946 | A      | A      | T      | G      | A      | T      | A      | A      | C      | T      | T      | A      | G      | A      | G      | T      | A      | G      |
| 6.87   | Wt.5     | 6982 | A      | A      | T      | G      | A      | T      | A      | A      | C      | T      | T      | A      | G      | A      | G      | T      | A      | G      |
| 6.91   | Var.2.6  | 7517 | A      | A      | T      | G      | A      | T      | A      | A      | C      | T      | T      | A      | G      | A      | G      | T      | A      | G      |
| 6.92   | Gy.0     | 8214 | A      | A      | T      | G      | A      | T      | A      | A      | C      | T      | T      | A      | G      | A      | G      | T      | A      | G      |
| 6.97   | LL.0     | 6933 | A      | A      | T      | G      | A      | T      | A      | A      | C      | T      | T      | A      | G      | A      | G      | T      | A      | G      |
| 7.03   | Ga.0     | 6919 | A      | A      | T      | G      | A      | T      | A      | A      | C      | T      | T      | A      | G      | A      | G      | T      | A      | G      |
| 7.05   | Aq.0     | 6897 | A      | A      | T      | G      | A      | T      | A      | A      | C      | T      | T      | A      | G      | A      | G      | T      | A      | G      |
| 7.10   | Col.0    | 6909 | A      | A      | T      | G      | A      | T      | A      | A      | C      | T      | T      | A      | G      | A      | G      | T      | A      | G      |
| 7.13   | Pro.0    | 8213 | A      | A      | T      | G      | A      | T      | A      | A      | C      | T      | T      | A      | G      | A      | G      | T      | A      | G      |
| 7.18   | ML.0     | 6939 | A      | A      | T      | G      | A      | T      | A      | A      | C      | T      | T      | A      | G      | A      | G      | T      | A      | G      |
| 7.19   | REN.1    | 6959 | A      | A      | T      | G      | A      | T      | A      | A      | C      | T      | T      | A      | G      | A      | G      | T      | A      | G      |
| 7.24   | CIBC.17  | 6907 | A      | A      | T      | G      | A      | T      | A      | A      | C      | T      | T      | A      | G      | A      | G      | T      | A      | G      |
| 7.26   | HR.5     | 6924 | A      | A      | T      | G      | A      | T      | A      | A      | C      | T      | T      | A      | G      | A      | G      | T      | A      | G      |
| 7.32   | REN.11   | 6960 | A      | A      | T      | G      | A      | T      | A      | A      | C      | T      | T      | A      | G      | A      | G      | T      | A      | G      |
| 7.34   | Cl.1     | 6910 | A      | A      | T      | G      | A      | T      | A      | A      | C      | T      | T      | A      | G      | A      | G      | T      | A      | G      |
| 7.36   | Br.0     | 6904 | A      | A      | T      | G      | A      | T      | A      | A      | C      | T      | T      | A      | G      | A      | G      | T      | A      | G      |
| 7.44   | Mrk.0    | 6937 | A      | A      | T      | G      | A      | T      | A      | A      | C      | T      | T      | A      | G      | A      | G      | T      | A      | G      |
| 7.44   | Nok.3    | 6945 | A      | A      | T      | G      | A      | T      | A      | A      | C      | T      | T      | A      | G      | A      | G      | T      | A      | G      |
| 7.48   | Ra.0     | 6958 | A      | A      | T      | G      | A      | T      | A      | A      | C      | T      | T      | A      | G      | A      | G      | T      | A      | G      |
| 7.50   | Kin.0    | 6926 | A      | A      | T      | G      | A      | T      | A      | A      | C      | T      | T      | A      | G      | A      | G      | T      | A      | G      |
| 7.56   | SQ.8     | 6967 | A      | A      | T      | G      | A      | T      | A      | A      | C      | T      | T      | A      | G      | A      | G      | T      | A      | G      |
| 7.69   | UIL2.5   | 6974 | A      | A      | T      | G      | A      | T      | A      | A      | C      | T      | T      | A      | G      | A      | G      | T      | A      | G      |
| 7.99   | Var.2.1  | 7516 | A      | A      | T      | G      | A      | T      | A      | A      | C      | T      | T      | A      | G      | A      | G      | T      | A      | G      |

**Table S4.** Single nucleotide polymorphisms with corresponding base position, gene, base call, Wilcoxon score, EMMA score, and nucleotide diversity score.

| SNP#   | Chr | Base     | Gene      | 1 | 2 | Wilcoxon | EMMA | Diversity |
|--------|-----|----------|-----------|---|---|----------|------|-----------|
| 118594 | 3   | 20409100 | AT3G55070 | A | G | 4.14     | 2.64 | 0.287     |
| 118595 | 3   | 20409187 | AT3G55070 | A | G | 4.14     | 2.64 | 0.287     |
| 118596 | 3   | 20409475 | AT3G55070 | C | T | 4.02     | 2.18 | 0.334     |
| 118597 | 3   | 20409973 | AT3G55070 | A | G | 4.53     | 3.09 | 0.311     |
| 118598 | 3   | 20410063 | AT3G55070 | A | G | 0.15     | 0.03 | 0.433     |
| 118599 | 3   | 20410101 | AT3G55070 | C | T | 1.68     | 2.01 | 0.205     |
| 118600 | 3   | 20410893 | AT3G55070 | A | T | 4.14     | 2.64 | 0.287     |
| 118601 | 3   | 20411394 | NA        | A | G | 0.67     | 0.34 | 0.675     |
| 118602 | 3   | 20411685 | AT3G55080 | A | C | 1.83     | 1.26 | 0.691     |
| 118603 | 3   | 20411760 | AT3G55080 | C | T | 4.14     | 2.64 | 0.287     |
| 118604 | 3   | 20412188 | AT3G55080 | A | T | 4.14     | 2.64 | 0.287     |
| 118605 | 3   | 20414398 | AT3G55080 | A | G | 4.14     | 2.64 | 0.287     |
| 118606 | 3   | 20415389 | AT3G55080 | A | G | 2.28     | 1.48 | 0.637     |
| 118607 | 3   | 20415801 | AT3G55080 | A | C | 1.83     | 1.26 | 0.691     |
| 118608 | 3   | 20417220 | AT3G55090 | G | T | 1.11     | 0.61 | 0.334     |
| 118609 | 3   | 20417245 | AT3G55090 | G | T | 4.06     | 2.37 | 0.311     |
| 118610 | 3   | 20418355 | AT3G55090 | A | C | 4.14     | 2.64 | 0.287     |
| 118611 | 3   | 20418626 | NA        | A | G | 1.31     | 0.35 | 0.483     |

**Table S5.** Expression of all genes in the neighborhood of *ABCG16* (At3g55090) in response to bacterial infection and exogenous application of ABA, IAA, and SA.

| Gene             | Description                           | NASCArray-120 |                | NASCArray-176 |            |             | NASCArray-175 |            |            | NASCArray-192 |            |
|------------------|---------------------------------------|---------------|----------------|---------------|------------|-------------|---------------|------------|------------|---------------|------------|
|                  |                                       | Mock          | Pst DC3000 2hr | Mock          | ABA 1hr    | ABA 3hr     | Mock          | IAA 1hr    | IAA 3hr    | Mock          | SA 3hr     |
| AT3G54750        | putative protein                      | 63            | 0.9            | 160           | 1.0        | 0.9         | 169           | 1.1        | 1.2        | 158           | 0.9        |
| AT3G54770        | RNA binding protein                   | 4             | 0.8            | 78            | 0.5        | 0.4         | 70            | 0.4        | 0.5        | 83            | 0.6        |
| AT3G54790        | putative protein                      | 230           | 0.9            | 97            | 1.0        | 0.6         | 103           | 1.1        | 1.1        | 125           | 0.9        |
| AT3G54800        | putative protein                      | 15            | 1.1            | 13            | 1.0        | 0.4         | 8             | 1.8        | 0.7        | 14            | 0.5        |
| AT3G54810        | GATA transcription factor 3           | 152           | 1.0            | 128           | 0.9        | 0.8         | 138           | 1.2        | 1.1        | 123           | 1.0        |
| AT3G54820        | aquaporin                             | 37            | 2.3            | 51            | 1.2        | 1.6         | 34            | 0.9        | 0.5        | 42            | 0.6        |
| AT3G54840        | small GTP-binding protein             | 257           | 1.1            | 208           | 1.0        | 1.3         | 195           | 1.0        | 1.0        | 256           | 0.9        |
| AT3G54850        | putative protein                      | 80            | 1.4            | 38            | 0.9        | 1.4         | 41            | 1.2        | 0.9        | 42            | 1.1        |
| AT3G54860        | vacuolar sorting protein              | 153           | 0.9            | 118           | 1.1        | 0.9         | 107           | 1.2        | 1.0        | 109           | 1.0        |
| AT3G54870        | kinesin-like protein                  | 8             | 1.0            | 38            | 1.1        | 0.9         | 34            | 0.9        | 1.1        | 26            | 0.7        |
| AT3G54890        | chlorophyll a/b-binding protein       | 4061          | 0.8            | 2721          | 0.7        | 0.7         | 2074          | 1.3        | 0.9        | 1858          | 1.1        |
| AT3G54900        | thioredoxin-like protein              | 917           | 0.7            | 681           | 0.9        | 0.7         | 646           | 1.0        | 0.9        | 540           | 0.9        |
| AT3G54920        | pectate lyase                         | 91            | 0.6            | 175           | 0.6        | 0.3         | 190           | 1.1        | 0.9        | 164           | 0.5        |
| AT3G54930        | protein phosphatase                   | 16            | 1.7            | 32            | 1.5        | 0.7         | 22            | 1.0        | 0.9        | 31            | 0.6        |
| AT3G54940        | cysteine proteinase                   | 3             | 1.2            | 8             | 2.9        | 1.1         | 5             | 0.7        | 0.3        | 17            | 0.4        |
| AT3G54950        | putative protein patatin              | 43            | 1.1            | 23            | 1.2        | 1.3         | 39            | 1.9        | 2.3        | 30            | 1.9        |
| AT3G54960        | disulphide isomerase                  | 172           | 2.5            | 299           | 0.9        | 1.1         | 296           | 0.9        | 1.0        | 245           | 1.2        |
| AT3G54970        | hypothetical protein                  | 33            | 1.1            | 28            | 1.0        | 0.8         | 31            | 1.1        | 1.2        | 25            | 1.0        |
| AT3G54980        | putative protein CRP1                 | 48            | 1.0            | 37            | 0.8        | 0.8         | 56            | 1.4        | 1.2        | 40            | 1.3        |
| AT3G54990        | APETALA2 - like protein               | 12            | 0.5            | 43            | 1.0        | 0.9         | 29            | 0.7        | 0.7        | 71            | 0.5        |
| AT3G55000        | Expressed protein                     | 79            | 1.3            | 100           | 0.6        | 0.9         | 105           | 0.9        | 1.2        | 90            | 0.9        |
| AT3G55005        | Expressed protein                     | 41            | 1.0            | 65            | 1.1        | 1.0         | 47            | 1.2        | 0.9        | 53            | 0.8        |
| AT3G55010        | cyclo-ligase precursor                | 126           | 0.8            | 220           | 0.9        | 0.6         | 214           | 1.0        | 1.1        | 190           | 0.9        |
| AT3G55020        | putative protein                      | 106           | 1.1            | 74            | 1.0        | 1.1         | 67            | 1.0        | 1.0        | 63            | 0.7        |
| AT3G55030        | phosphatidylglycerophosphate synthase | 137           | 1.0            | 109           | 1.2        | 1.3         | 137           | 1.1        | 1.2        | 105           | 0.9        |
| AT3G55040        | putative protein                      | 402           | 0.8            | 201           | 0.9        | 0.8         | 224           | 0.9        | 0.9        | 210           | 1.0        |
| AT3G55050        | protein phosphatase                   | 120           | 1.0            | 119           | 1.0        | 1.1         | 119           | 1.1        | 1.0        | 135           | 0.9        |
| AT3G55060        | centromere protein                    | 18            | 1.4            | 22            | 1.8        | 0.4         | 18            | 1.6        | 1.0        | 21            | 0.8        |
| AT3G55070        | putative protein                      | 78            | 1.1            | 81            | 1.3        | 1.4         | 60            | 1.2        | 0.7        | 68            | 1.0        |
| AT3G55080        | putative protein                      | 89            | 1.0            | 77            | 0.8        | 0.8         | 74            | 0.9        | 1.0        | 83            | 1.0        |
| <b>AT3G55090</b> | <b>ABC transporter</b>                | <b>14</b>     | <b>2.8</b>     | <b>8</b>      | <b>4.3</b> | <b>38.1</b> | <b>17</b>     | <b>0.9</b> | <b>3.5</b> | <b>15</b>     | <b>3.8</b> |
| AT3G55100        | ABC transporter                       | 5             | 2.4            | 8             | 1.2        | 0.8         | 6             | 0.4        | 0.4        | 5             | 1.2        |
| AT3G55110        | ABC transporter                       | 46            | 1.1            | 52            | 1.1        | 0.7         | 42            | 0.9        | 0.7        | 46            | 0.8        |
| AT3G55120        | chalcone isomerase                    | 81            | 0.8            | 184           | 1.0        | 1.2         | 185           | 0.9        | 0.7        | 173           | 1.2        |
| AT3G55130        | ABC transporter                       | 154           | 0.8            | 62            | 1.2        | 0.7         | 64            | 0.9        | 1.3        | 60            | 1.0        |
| AT3G55140        | pectate lyase                         | 121           | 1.0            | 84            | 1.0        | 0.9         | 72            | 1.2        | 1.1        | 77            | 1.0        |
| AT3G55150        | leucine zipper-containing             | 25            | 6.0            | 43            | 0.7        | 0.6         | 34            | 0.9        | 0.8        | 42            | 1.0        |
| AT3G55160        | putative protein                      | 46            | 0.8            | 48            | 0.8        | 0.9         | 44            | 0.8        | 1.0        | 42            | 0.8        |
| AT3G55170        | ribosomal L35                         | 45            | 0.6            | 96            | 1.4        | 1.0         | 76            | 0.8        | 1.1        | 66            | 0.6        |
| AT3G55180        | lipase                                | 8             | 1.3            | 13            | 2.8        | 0.5         | 7             | 7.6        | 0.5        | 6             | 1.0        |
| AT3G55190        | lipase                                | 10            | 0.7            | 6             | 0.9        | 1.0         | 4             | 1.2        | 2.1        | 10            | 0.9        |
| AT3G55250        | pectate-lyase                         | 698           | 0.7            | 737           | 1.0        | 1.0         | 624           | 0.9        | 0.9        | 505           | 1.0        |
| AT3G55260        | beta-N-acetylhexosaminidas            | 163           | 0.6            | 118           | 1.1        | 0.8         | 126           | 0.9        | 0.9        | 100           | 1.6        |
| AT3G55270        | phosphatase                           | 65            | 1.3            | 45            | 0.9        | 1.1         | 42            | 1.0        | 1.2        | 41            | 0.9        |
| AT3G55280        | ribosomal L23a                        | 366           | 0.9            | 696           | 0.9        | 0.6         | 729           | 1.0        | 1.0        | 550           | 1.0        |
| AT3G55300        | putative protein                      | 9             | 0.9            | 12            | 0.4        | 0.6         | 4             | 0.7        | 0.6        | 10            | 0.7        |
| AT3G55320        | P-glycoprotein                        | 71            | 1.1            | 51            | 1.0        | 1.7         | 61            | 0.9        | 1.0        | 44            | 1.0        |
| AT3G55330        | psbP                                  | 904           | 0.8            | 560           | 0.9        | 0.7         | 634           | 1.0        | 0.9        | 864           | 0.8        |
| AT3G55350        | putative protein                      | 17            | 0.4            | 30            | 0.9        | 0.8         | 33            | 1.0        | 0.9        | 30            | 0.9        |
| AT3G55360        | glycoprotein SC2                      | 576           | 0.7            | 646           | 0.9        | 1.4         | 678           | 0.9        | 1.0        | 707           | 1.2        |
| AT3G55370        | zinc finger protein OBP3              | 6             | 1.3            | 10            | 0.9        | 1.3         | 5             | 0.6        | 1.1        | 9             | 0.5        |
| AT3G55380        | E2, ubiquitin-conjugating             | 123           | 1.3            | 154           | 0.8        | 0.8         | 159           | 0.9        | 1.0        | 173           | 1.0        |
| AT3G55390        | putative protein MtN24                | 55            | 1.1            | 66            | 0.9        | 0.4         | 43            | 0.8        | 0.8        | 40            | 1.1        |
| AT3G55400        | methionyl-tRNA synthetase             | 160           | 0.7            | 165           | 1.0        | 1.0         | 226           | 0.9        | 1.0        | 213           | 0.9        |
| AT3G55410        | 2-oxoglutarate dehydrogenase          | 325           | 1.3            | 335           | 1.0        | 0.8         | 384           | 1.0        | 1.2        | 278           | 1.2        |
| AT3G55420        | putative protein                      | 51            | 0.8            | 71            | 0.8        | 0.8         | 53            | 1.0        | 0.8        | 56            | 0.8        |
| AT3G55430        | beta-1,3-glucanase                    | 161           | 0.7            | 140           | 1.8        | 4.9         | 149           | 1.0        | 1.2        | 118           | 1.5        |
| AT3G55440        | cytosolic triosephosphatisomerase     | 1754          | 0.9            | 2573          | 0.8        | 0.8         | 1996          | 1.1        | 1.0        | 1829          | 1.1        |
| AT3G55450        | serine/threonine protein kinase       | 177           | 1.4            | 95            | 0.9        | 0.3         | 102           | 1.2        | 1.2        | 112           | 1.2        |
| AT3G55460        | putative RNA binding protein          | 253           | 1.1            | 219           | 0.9        | 1.0         | 227           | 0.9        | 0.9        | 177           | 1.3        |
| AT3G55470        | FIERG2 protein                        | 20            | 3.2            | 26            | 0.8        | 0.6         | 23            | 1.3        | 1.0        | 36            | 2.4        |

**Table S6.** Primers list for RT-PCR, gene and promoter cloning.

| <b>Name</b> | <b>sequences</b>                         | <b>Note</b>       |
|-------------|------------------------------------------|-------------------|
| RT-ABCG16F  | CCTCAGTATTGGATTTGGTTTC                   | RT-PCR            |
| RT-ABCG16R  | CCTACCGTGATAAGCAAGCAGT                   | 296 bp            |
| AtAct2F     | CTCTCCCGCTATGTATGTCGC                    | RT-PCR            |
| AtAct2R     | GTAAGGTCACGTCCAGCAAGG                    | 178 bp            |
| ABCG16F     | CACCATGTCTCGCATACTAGTAGAAG               | Cloning           |
| ABCG16F     | TCACCTCCTCTTGTTTTTGCTCCC                 | 2215 bp           |
| pABCG16F    | GTGCGTGTGAGCTATATGCCATC                  | Promoter          |
| pABCG16R    | CTCTGTTTTGCTAGTATCTGTGTA                 | 1388 bp           |
| Primer A    | GAATTCCTGCAGCCCcaaacac                   | AmiRNAi<br>699 bp |
| Primer B    | GGATCCCCcatggcgatgcc                     |                   |
| ABCG16I     | gaTACTAAGCTGTGTCACTGCTTtctctctttgtattcc  |                   |
| ABCG16II    | gaAAGCAGTGACACAGCTTAGTAtcaaagagaatcaatga |                   |
| ABCG16III   | gaAAACAGTGACACACCTTAGTTtcacaggtcgatgatg  |                   |
| ABCG16IV    | gaAACTAAGGTGTGTCACTGTTTctacatatattcct    |                   |

**Table S7.** RT-PCR measuring AtABCG16 expression in the two T-DNA insertion knockouts, *abcg16-1* and *abcg16-2*, relative to the Col-0 wildtype line (CS60000).

| <b>SALK Knockouts</b> | <b>WT</b> | <b><i>abcg16-1</i></b> | <b><i>abcg16-2</i></b> |
|-----------------------|-----------|------------------------|------------------------|
| Related to ACT2 rpp1  | 0.00044   | 0.00004                | 0.00010                |
| Related to ACT2 rpp2  | 0.00051   | 0.00005                | 0.00012                |
| Related to ACT2 rpp3  | 0.00085   | 0.00005                | 0.00007                |
| Average               | 0.00060   | 0.00005                | 0.00010                |
| <b>Ratio</b>          | 1         | <b>0.07749</b>         | <b>0.16058</b>         |
| STDEV                 |           | 0.01577                | 0.03776                |

**Table S8.** Plate assay results for germination (%) of *abcg16-1* and *abcg16-2* knockouts relative to the CS60000 background in response to low (0-3  $\mu$ M) or high (0-300  $\mu$ M) range abscisic acid (ABA), indole-3-acetic acid (IAA), or salicylic acid (SA).

| Experiment | Trt       | Line            | No. plates | No. Seeds per plate | Germination Average (%) | +/- SE |
|------------|-----------|-----------------|------------|---------------------|-------------------------|--------|
| Low Range  | Control   | Background      | 6          | 25                  | 92.7                    | 0.7    |
|            |           | <i>abcg16-1</i> | 6          | 25                  | 89.3                    | 2.2    |
|            |           | <i>abcg16-2</i> | 6          | 25                  | 91.3                    | 3.0    |
|            | ABA 1uM   | Background      | 6          | 25                  | 94.0                    | 2.3    |
|            |           | <i>abcg16-1</i> | 6          | 25                  | 88.0                    | 2.1    |
|            |           | <i>abcg16-2</i> | 6          | 25                  | 78.0                    | 4.5    |
|            | ABA 3uM   | Background      | 6          | 25                  | 52.0                    | 5.4    |
|            |           | <i>abcg16-1</i> | 6          | 25                  | 2.7                     | 1.3    |
|            |           | <i>abcg16-2</i> | 6          | 25                  | 29.3                    | 4.2    |
|            | IAA 1uM   | Background      | 6          | 25                  | 92.7                    | 1.6    |
|            |           | <i>abcg16-1</i> | 6          | 25                  | 88.7                    | 3.5    |
|            |           | <i>abcg16-2</i> | 6          | 25                  | 78.7                    | 2.0    |
|            | IAA 3uM   | Background      | 6          | 25                  | 93.3                    | 2.2    |
|            |           | <i>abcg16-1</i> | 6          | 25                  | 88.7                    | 2.8    |
|            |           | <i>abcg16-2</i> | 6          | 25                  | 82.0                    | 4.6    |
|            | SA 1uM    | Background      | 6          | 25                  | 94.0                    | 3.2    |
|            |           | <i>abcg16-1</i> | 6          | 25                  | 88.0                    | 4.5    |
|            |           | <i>abcg16-2</i> | 6          | 25                  | 86.7                    | 3.2    |
|            | SA 3uM    | Background      | 6          | 25                  | 93.3                    | 1.3    |
|            |           | <i>abcg16-1</i> | 6          | 25                  | 92.0                    | 2.7    |
|            |           | <i>abcg16-2</i> | 6          | 25                  | 85.3                    | 4.3    |
| High Range | Control   | Background      | 5          | 25                  | 93.6                    | 2.4    |
|            |           | <i>abcg16-1</i> | 5          | 25                  | 95.2                    | 3.2    |
|            |           | <i>abcg16-2</i> | 5          | 25                  | 94.4                    | 3.0    |
|            | ABA 100uM | Background      | 5          | 25                  | 0.0                     | 0.0    |
|            |           | <i>abcg16-1</i> | 5          | 25                  | 0.0                     | 0.0    |
|            |           | <i>abcg16-2</i> | 5          | 25                  | 0.0                     | 0.0    |
|            | ABA 300uM | Background      | 5          | 25                  | 0.0                     | 0.0    |
|            |           | <i>abcg16-1</i> | 5          | 25                  | 0.0                     | 0.0    |
|            |           | <i>abcg16-2</i> | 5          | 25                  | 0.0                     | 0.0    |
|            | IAA 100uM | Background      | 5          | 25                  | 89.6                    | 1.6    |
|            |           | <i>abcg16-1</i> | 5          | 25                  | 92.0                    | 2.2    |
|            |           | <i>abcg16-2</i> | 5          | 25                  | 91.2                    | 4.8    |
|            | IAA 300uM | Background      | 5          | 25                  | 91.2                    | 3.9    |
|            |           | <i>abcg16-1</i> | 5          | 25                  | 88.8                    | 2.0    |
|            |           | <i>abcg16-2</i> | 5          | 25                  | 94.4                    | 1.6    |
|            | SA 100uM  | Background      | 5          | 25                  | 87.2                    | 5.0    |
|            |           | <i>abcg16-1</i> | 5          | 25                  | 89.6                    | 3.5    |
|            |           | <i>abcg16-2</i> | 5          | 25                  | 96.0                    | 1.8    |
|            | SA 300uM  | Background      | 5          | 25                  | 0.0                     | 0.0    |
|            |           | <i>abcg16-1</i> | 5          | 25                  | 0.8                     | 0.8    |
|            |           | <i>abcg16-2</i> | 5          | 25                  | 2.4                     | 1.6    |

**Table S9.** Plate assay results for germination (%) on day 4, root length (cm) on day 10, and mortality (%) on day 30 of *abcg16-1* and *abcg16-2* knockouts relative to the CS60000 background in response to four concentrations of abscisic acid (ABA).

| Treatment | Line            | No. Plates | No. Seeds / Plate | Germination (%) |        | Root Length (cm) |        | Mortality (%) |        |
|-----------|-----------------|------------|-------------------|-----------------|--------|------------------|--------|---------------|--------|
|           |                 |            |                   | Average         | +/- SE | Average          | +/- SE | Average       | +/- SE |
| Control   | Background      | 10         | 25                | 91.2            | 2.2    | 1.25             | 0.07   | 0.9           | 0.9    |
|           | <i>abcg16-1</i> | 10         | 25                | 88.8            | 2.0    | 1.19             | 0.07   | 1.3           | 0.7    |
|           | <i>abcg16-2</i> | 10         | 25                | 94.8            | 1.0    | 1.25             | 0.09   | 2.1           | 1.3    |
| 0.5uM ABA | Background      | 10         | 25                | 92.8            | 1.8    | 1.11             | 0.04   | 22.3          | 5.6    |
|           | <i>abcg16-1</i> | 10         | 25                | 83.6            | 2.7    | 1.08             | 0.06   | 25.9          | 6.6    |
|           | <i>abcg16-2</i> | 10         | 25                | 87.2            | 2.3    | 0.72             | 0.05   | 45.1          | 4.5    |
| 1.0uM ABA | Background      | 10         | 25                | 93.2            | 1.5    | 1.02             | 0.04   | 33.5          | 2.0    |
|           | <i>abcg16-1</i> | 10         | 25                | 78.4            | 2.2    | 0.80             | 0.04   | 57.4          | 3.8    |
|           | <i>abcg16-2</i> | 10         | 25                | 84.0            | 2.1    | 0.65             | 0.03   | 66.2          | 3.3    |
| 1.5uM ABA | Background      | 10         | 25                | 90.4            | 1.6    | 0.99             | 0.04   | 70.5          | 7.1    |
|           | <i>abcg16-1</i> | 10         | 25                | 74.0            | 4.7    | 0.82             | 0.03   | 61.0          | 5.9    |
|           | <i>abcg16-2</i> | 10         | 25                | 72.4            | 2.9    | 0.40             | 0.02   | 75.1          | 3.5    |

**Table S10.** Leaf bacterial titers at 18 days post infection (dpi) following surface spray inoculation of soil-grown plants with *Pst* DC3118 (COR- mutant) and *Pst* DC3000 (COR+ wildtype) at Day 36 of plant growth. Six independent plants of Col-0 (background) and two T-DNA insertion knockouts of *ABCG16* (*abcg16-1*, *abcg16-2*) were sampled for each bacterial strain, for a total of 36 plants.

| Bacterial Strain  | PlantLine | Plant | Disk Area(cm <sup>2</sup> ) | Log(cfu/cm <sup>2</sup> ) | Average Log(cfu/cm <sup>2</sup> ) |
|-------------------|-----------|-------|-----------------------------|---------------------------|-----------------------------------|
| <i>Pst</i> DC3000 | Col-0     | 1     | 0.282                       | 5.61                      | 5.60                              |
|                   |           | 2     | 0.282                       | 5.47                      |                                   |
|                   |           | 3     | 0.282                       | 5.86                      |                                   |
|                   |           | 4     | 0.282                       | 5.31                      |                                   |
|                   |           | 5     | 0.282                       | 5.55                      |                                   |
|                   |           | 6     | 0.282                       | 5.77                      |                                   |
|                   | abcg16-1  | 1     | 0.282                       | 5.44                      | 5.58                              |
|                   |           | 2     | 0.282                       | 5.44                      |                                   |
|                   |           | 3     | 0.282                       | 5.55                      |                                   |
|                   |           | 4     | 0.282                       | 5.54                      |                                   |
|                   |           | 5     | 0.282                       | 5.92                      |                                   |
|                   |           | 6     | 0.282                       | 5.58                      |                                   |
|                   | abcg16-2  | 1     | 0.282                       | 6.19                      | 5.78                              |
|                   |           | 2     | 0.282                       | 5.46                      |                                   |
|                   |           | 3     | 0.282                       | 5.64                      |                                   |
|                   |           | 4     | 0.282                       | 5.61                      |                                   |
|                   |           | 5     | 0.282                       | 5.77                      |                                   |
|                   |           | 6     | 0.282                       | 6.02                      |                                   |
| <i>Pst</i> DC3118 | Col-0     | 1     | 0.282                       | 5.08                      | 5.23                              |
|                   |           | 2     | 0.282                       | 5.01                      |                                   |
|                   |           | 3     | 0.282                       | 5.19                      |                                   |
|                   |           | 4     | 0.282                       | 5.34                      |                                   |
|                   |           | 5     | 0.282                       | 5.08                      |                                   |
|                   |           | 6     | 0.282                       | 5.66                      |                                   |
|                   | abcg16-1  | 1     | 0.282                       | 5.45                      | 5.47                              |
|                   |           | 2     | 0.282                       | 5.48                      |                                   |
|                   |           | 3     | 0.282                       | 5.49                      |                                   |
|                   |           | 4     | 0.282                       | 5.31                      |                                   |
|                   |           | 5     | 0.282                       | 5.65                      |                                   |
|                   |           | 6     | 0.282                       | 5.44                      |                                   |
|                   | abcg16-2  | 1     | 0.282                       | 5.74                      | 5.54                              |
|                   |           | 2     | 0.282                       | 5.42                      |                                   |
|                   |           | 3     | 0.282                       | 5.51                      |                                   |
|                   |           | 4     | 0.282                       | 5.55                      |                                   |
|                   |           | 5     | 0.282                       | 5.44                      |                                   |
|                   |           | 6     | 0.282                       | 5.57                      |                                   |



**Table S11.** Shoot dry biomass (mg) at Day 95 of plant growth following surface spray inoculation of soil-grown plants with *Pst* DC3118 (COR- mutant) and *Pst* DC3000 (COR+ wildtype) at Day 36 of plant growth. Twelve independent plants of Col-0 (background) and two T- DNA insertion knockouts of *ABCG16* (*abcg16-1*, *abcg16-2*) were harvested from each treatment, for a total of 72 plants.

| <b>Bacterial Strain</b> | <b>Plant Line</b> | <b>No. Plants</b> | <b>Average Shoot Dry Mass(mg)</b> | <b>+/- SE</b> |
|-------------------------|-------------------|-------------------|-----------------------------------|---------------|
| <i>Pst</i> DC3118       | Background        | 12                | 34.3                              | 4.1           |
|                         | <i>abcg16-1</i>   | 12                | 36.1                              | 4.3           |
|                         | <i>abcg16-2</i>   | 12                | 29.0                              | 3.3           |
| <i>Pst</i> DC3000       | Background        | 12                | 36.9                              | 3.9           |
|                         | <i>abcg16-1</i>   | 12                | 19.4                              | 3.0           |
|                         | <i>abcg16-2</i>   | 12                | 23.5                              | 2.4           |
